# Supplementary material
Source: MDPI journal article supplement (https://www.mdpi.com/2072-4292/16/9/1633)
Supplement: s1 [file s1]

**Table S2.** MAPE for different number of terms, crops, and seasons for Fourier fitting.

| Function | Crop                 | Season | MAPE, % |
|----------|----------------------|--------|---------|
| 1 term   | Soybean              | 2021   | 11.6    |
|          |                      | 2022   | 11.6    |
|          | Fallow               | 2021   | 5.4     |
|          |                      | 2022   | 7.8     |
|          | Oat                  | 2021   | 6.1     |
|          |                      | 2022   | 19.8    |
|          | Buckwheat            | 2021   | 12.5    |
|          |                      | 2022   | 12.5    |
|          | Perennial<br>grasses | 2021   | 13.1    |
|          |                      | 2022   | 17.4    |
| 2 terms  | Soybean              | 2021   | 11.6    |
|          |                      | 2022   | 12.0    |
|          | Fallow               | 2021   | 4.3     |
|          |                      | 2022   | 6.0     |
|          | Oat                  | 2021   | 6.9     |
|          |                      | 2022   | 8.3     |
|          | Buckwheat            | 2021   | 10.1    |
|          |                      | 2022   | 7.1     |
|          | Perennial<br>grasses | 2021   | 8.1     |
|          |                      | 2022   | 7.7     |
| 3 terms  | Soybean              | 2021   | 5.0     |
|          |                      | 2022   | 6.4     |
|          | Fallow               | 2021   | 1.8     |
|          |                      | 2022   | 3.2     |
|          | Oat                  | 2021   | 1.9     |
|          |                      | 2022   | 4.2     |
|          | Buckwheat            | 2021   | 4.8     |
|          |                      | 2022   | 5.9     |
|          | Perennial<br>grasses | 2021   | 5.3     |
|          |                      | 2022   | 7.2     |
