# Supplementary material
Source: MDPI journal article supplement (https://www.mdpi.com/2072-4292/16/9/1633)
Supplement: s1 [file s1]

| <b>Metric</b> | <b>SVM</b> | <b>RF</b> | <b>GB</b> |
|---------------|------------|-----------|-----------|
| Set 1         | 59.9       | 84.3      | 84.1      |
| Set 2         | 72.9       | 89.9      | 88.0      |
| Set 3         | 96.9       | 97.6      | 97.3      |
| Set 4         | 70.3       | 81.7      | 85.7      |
| Set 5         | 79.7       | 90.6      | 91.3      |
| Set 6         | 49.7       | 87.4      | 89.0      |
| Set 7         | 74.5       | 88.6      | 90.3      |
| Set 8         | 41.0       | 76.1      | 66.9      |
| Set 9         | 69.1       | 80.6      | 80.3      |
| Set 10        | 60.5       | 94.7      | 85.9      |
| Mean OA, %    | 67.3       | 87.2      | 85.9      |
